1 The L1 stalk is required for efficient export of nascent large ribosomal subunits in yeast

2

3

4 Sharmishtha Musalgaonkar, Joshua J. Black, Arlen W. Johnson #

5

6 Department of Molecular Biosciences, The University of Texas at Austin, Austin, Texas,

7 USA

8

9 Running head: L1 stalk and large subunit export

10

11 # Corresponding author

12 Email: [arlen@austin.utexas.edu](mailto:arlen@austin.utexas.edu) (AWJ)

13

14

1 **Abstract**

2 The ribosomal protein Rpl1 (uL1 in universal nomenclature) is essential in yeast and  
3 constitutes part of the L1 stalk which interacts with E site ligands on the ribosome.  
4 Structural studies of nascent pre-60S complexes in yeast have shown that a domain of  
5 the Crm1-dependent nuclear export adapter Nmd3, binds in the E site and interacts with  
6 Rpl1, inducing closure of the L1 stalk. Based on this observation, we decided to  
7 reinvestigate the role of the L1 stalk in nuclear export of pre-60S subunits despite previous  
8 work showing that Rpl1-deficient ribosomes are exported from the nucleus and engage  
9 in translation. Large cargoes, such as ribosomal subunits, require multiple export factors  
10 to facilitate their transport through the nuclear pore complex. Here, we show that pre-60S  
11 subunits lacking Rpl1 or truncated for the RNA of the L1 stalk are exported inefficiently.  
12 Surprisingly, this is not due to a measurable defect in recruitment of Nmd3 but appears  
13 to result from inefficient recruitment of the Mex67-Mtr2 heterodimer.

14

## 1 **Introduction**

2 Ribosomes are universally composed of one large and one small subunit, that function  
3 together to synthesize all proteins in a cell. Production of balanced levels of ribosomal  
4 subunits is critical for maintaining homeostasis in cells. In yeast four rRNA molecules and  
5 about 80 ribosomal proteins interact with more than 200 trans-acting assembly factors to  
6 achieve the complex task of ribosome synthesis (Woolford and Baserga 2013). Synthesis  
7 of new ribosomes by cells is a challenging and energy consuming task and requires the  
8 coordinated expression of all ribosomal proteins and rRNAs. In yeast, failure to establish  
9 balanced expression levels of ribosomal proteins has been reported to cause cellular  
10 stress (Boulon et al. 2010; Cheng et al. 2019). Haploinsufficiency and mutations in  
11 ribosomal proteins in drosophila and zebrafish cause defects and delays in development  
12 (Amsterdam et al. 2004). In humans, mutations in genes coding for ribosomal proteins  
13 and biogenesis factors, give rise to a special class of diseases called ribosomopathies  
14 (De Keersmaecker et al. 2013; Mills and Green 2017; Warren 2018).

15 In eukaryotic cells, ribosome assembly starts in the sub-nuclear compartment called the  
16 nucleolus; it continues in the nucleoplasm followed by nuclear export; and concludes in  
17 the cytoplasm rendering fully matured subunits (reviewed in(Woolford and Baserga 2013;  
18 Kressler et al. 2017; Peña et al. 2017)). Although, the precursor rRNA for both subunits  
19 is a single transcript, RNA processing in the nucleolus separates precursors for the two  
20 subunits before nuclear export. Much of ribosomal subunit assembly is completed in the  
21 nucleus before the subunits are exported to the cytoplasm. The nuclear export machinery  
22 has to therefore undertake a critical task of escorting the highly hydrophilic and bulky pre-  
23 ribosomal subunits through hydrophobic environment of the nuclear pore complex (NPC).

1 It was previously shown that large cargoes require multiple receptor molecules for  
2 effecting transient and reversible collapse of the hydrophobic permeability barrier in NPC  
3 for rapid translocation (Ribbeck and Görlich 2002). Consistent with this model, several  
4 export factors are required for the export of nascent 60S subunits. Export is facilitated by  
5 the export adaptor protein Nmd3 that utilizes its nuclear export sequence (NES) to recruit  
6 the export-receptor Crm1 (Ho et al. 2000; Gadai et al. 2001). Nuclear export is also  
7 assisted by other non-canonical export factors including Arx1 (Hung et al. 2007; Greber  
8 et al. 2012, 2016; Bradatsch et al. 2007) and Bud20 (Bassler et al. 2012; Altvater et al.  
9 2012) and the mRNA export factor Mex67-Mtr2 heterodimer (Yao et al. 2007) in yeast but  
10 only Nmd3 appears to be conserved throughout eukaryotes as a dedicated 60S export  
11 factor (Thomas and Kutay 2003). However, unlike its essential role in 60S biogenesis,  
12 Nmd3 interaction with Crm1 is dispensable if other export receptors are fused directly to  
13 Nmd3 (Lo and Johnson 2009) indicating a general requirement for interaction with the  
14 NPC but not a specific requirement for a particular export receptor.

15         Recent high resolution structures of ribosome assembly intermediates have  
16 revealed the binding sites of numerous biogenesis factors including all known export  
17 factors with the exception of Mex67-Mtr2 (Zhou et al. 2019; Malyutin et al. 2017; Greber  
18 et al. 2016; Wu et al. 2016; Ma et al. 2017; Matsuo et al. 2014; Barrio-Garcia et al. 2016).  
19 Arx1 binds on the solvent-exposed surface of the subunit near the peptide exit tunnel  
20 (PET) whereas Nmd3 binds on the subunit interface spanning the E, P and A-sites of the  
21 subunit. However, the C-terminal region of Nmd3 which contains the NES that recruits  
22 Crm1, is not resolved on any of the structures. Therefore, the position of Crm1 relative to  
23 the subunit during export is still unknown. Bud20 also binds on the subunit interface where

1 it interacts with Tif6 and Rlp24, although the mechanism by which Bud20 promotes export  
2 is disputed (Bassler et al. 2012; Altvater et al. 2012). Densities for Mex67-Mtr2  
3 heterodimer were not detected in any structures of pre-60S particles to date. However,  
4 UV-induced protein-RNA crosslinking studies *in vivo* identified crosslinks to many regions  
5 of the 25S rRNA, but strongly enriched in the 3' terminal end of 5.8S rRNA (Tuck and  
6 Tollervey 2013). In addition, a recent study attempting to reconstitute Mex67-Mtr2 binding  
7 to affinity-purified pre-60S particles *in vitro* identified crosslinks to 5.8S and P-stalk rRNA  
8 (Sarkar et al. 2016). However, binding to the P-stalk was only observed for Yvh1-  
9 containing pre-60S particles while our recent structural studies and work from others  
10 show that Yvh1 joins the subunit only in the cytoplasm (Kemmler et al. 2009; Lo et al.  
11 2009; Nerurkar et al. 2018; Zhou et al. 2019) and hence, cannot be responsible for  
12 promoting Mex67-Mtr2 binding to pre-60S in the nucleus.

13 Ribosomal Protein L1 (Rpl1) is universally conserved protein which interacts with  
14 a single loop of the 25S rRNA to form the L1 stalk. Rpl1 is essential in yeast and is  
15 encoded by two paralogous genes *RPL1A* and *RPL1B*. It was previously reported that  
16 60S subunits lacking Rpl1 are exported to the cytoplasm and even detected in the  
17 polysomes (McIntosh et al. 2011), suggesting that 60S assembly and export can proceed  
18 in the absence of Rpl1. However, the essential export adapter Nmd3 binds Rpl1 and  
19 facilitates closure of the L1 stalk (Malyutin et al. 2017; Zhou et al. 2019; Ma et al. 2017).  
20 Because of the interaction between Rpl1 and Nmd3, we suspected that ribosomes lacking  
21 Rpl1 would be affected in their ability to bind Nmd3 or to release it.

22 Here we show that Rpl1 protein is needed for efficient nuclear export of nascent  
23 large subunits precursors. The repression of the *RPL1* or truncation of the L1 stalk rRNA

1 reduced the efficiency of export but did not completely block export from the nucleus.  
2 Nascent subunits lacking Rpl1 maintained binding to the export factors Nmd3, Arx1 and  
3 Bud20 but only inefficiently recruited the Mex67-Mtr2 heterodimer. Co-overexpression of  
4 *MEX67* and *MTR2* in *RPL1* repressed cells overcame the 60S export defect caused by  
5 loss of Rpl1 suggesting that delayed export of Rpl1-deficient subunits is due to a failure  
6 in Mex67-Mtr2 recruitment.

## 7 **Results**

### 8 **Repression of Rpl1 leads to a 60S subunit export defect**

9 Recent cryo-EM structures of the nuclear export adapter Nmd3 on the 60S subunit  
10 revealed a large interface between the eIF5A-like domain of Nmd3 and ribosomal protein  
11 Rpl1 on the L1 stalk (Malyutin et al. 2017; Zhou et al. 2019; Ma et al. 2017). The  
12 interaction between Nmd3 and Rpl1 holds the L1 stalk in a closed conformation in which  
13 the L1 stalk is bent toward the E site. Conceivably, the interaction between Rpl1 and  
14 Nmd3 may be important for the recruitment of Nmd3 to the pre-60S subunit in the nucleus.  
15 Alternatively, this compact structure could facilitate export of the nascent 60S subunit  
16 through the nuclear pore complex or facilitate the release of Nmd3 from the pre-60S  
17 subunit after export to the cytoplasm. Although previous work reported that Rpl1 was not  
18 needed for 60S export (McIntosh et al. 2011), we decided to revisit this question. We first  
19 asked if nuclear export of 60S subunits was affected by loss of Rpl1. In yeast, Rpl1 is  
20 expressed from two paralogous genes, *RPL1A* and *RPL1B*, each encoding identical  
21 proteins. Because deletion of both genes is lethal, we used a conditional mutant in which  
22 *RPL1B* was deleted and *RPL1A* was under control of the galactose inducible/glucose

1 repressible *GAL1* promoter. 60S subunit localization was monitored with a GFP fusion to  
2 Rpl25. Upon shifting cells from galactose to glucose to repress Rpl1A expression, we  
3 observed a strong change in Rpl25-GFP localization from the cytoplasm to the nucleus  
4 (Fig. 1A), indicating impaired 60S export. Similar results were obtained using Rpl8-GFP  
5 as a reporter (data not shown). The accumulation was most evident within 60 to 90  
6 minutes after returning saturated cultures to active growth. At longer time points, Rpl25  
7 signal became increasingly cytoplasmic, indicating that export continued, albeit at a  
8 slower rate than when Rpl1A was expressed (data not shown). Nuclear accumulation of  
9 Rpl25-GFP was also observed in an *rpl1b* $\Delta$  strain in which Rpl1 was constitutively  
10 expressed at reduced levels compared to wild-type cells due to deletion of *RPL1B* (see  
11 below).

12 Pre-60S subunits are accompanied to the cytoplasm with a host of assembly factors  
13 including Nmd3, Mrt4, Tif6 and Arx1 (Zhou et al. 2019; Ma et al. 2017; Wu et al. 2016;  
14 Barrio-Garcia et al. 2016). Although each of these factors continually shuttles in and out  
15 of the nucleus, they show different steady state localizations: Mrt4 and Tif6 are  
16 predominantly nucleolar whereas Arx1 is nucleoplasmic and Nmd3 is cytoplasmic (Lo et  
17 al. 2010). Upon glucose repression of *RPL1* expression, Mrt4 and Tif6 re-localized from  
18 the nucleolus to the nucleoplasm whereas the nucleoplasmic localization of Arx1 was  
19 largely unchanged (Fig. 1B). Strikingly, Nmd3 was relocalized from the cytoplasm to the  
20 nucleoplasm (Fig. 1B). These results imply that in the absence of Rpl1 expression, pre-  
21 60S particles containing Tif6, Mrt4, and probably Arx1 and Nmd3 accumulate at a late  
22 assembly step in the nucleoplasm, prior to export. We conclude that Rpl1 is necessary  
23 for efficient export of 60S subunits from the nucleus.

## 1 **Nmd3 binds to nascent subunits lacking Rpl1.**

2 Because Nmd3 binds to Rpl1 and provides an essential Crm1-dependent nuclear export  
3 signal for the 60S subunit, a lack of Nmd3 binding to the pre-60S particle could explain  
4 the export block observed upon repression of Rpl1. We tested if Nmd3 is lost from nascent  
5 60S subunits under conditions where we observed accumulation of Nmd3 in the nucleus  
6 after Rpl1 repression. Cells expressing Rpl1 from its native promoters or under control of  
7 the glucose-repressible *GAL1* promoter were shifted from galactose to glucose. Extracts  
8 were prepared and sedimented through sucrose density gradients and the positions of  
9 Nmd3, Rpl1 and Rpl8 were monitored by western blotting. Surprisingly, Nmd3 co-  
10 sedimentation with free 60S subunits was largely unaffected by *RPL1* repression (Fig. 2,  
11 compare panel B with A). The slight accumulation of free Nmd3 at the top of the gradient  
12 in Rpl1-repressed cells (Fig. 2B) cannot account for the bulk redistribution of Nmd3 from  
13 the cytoplasm to the nucleus in these cells. These results suggest that the population of  
14 Nmd3 that accumulates in the nucleus upon *RPL1* repression is bound to pre-60S  
15 subunits.

16 To test directly if Nmd3 binds to subunits lacking Rpl1, we immunoprecipitated subunits  
17 associated with Nmd3 from cells in which Rpl1 was expressed or repressed. We used  
18 Arx1 as a control for a pre-60S associated protein whose binding is not expected to be  
19 dependent on Rpl1. Similar levels of 60S subunits, indicated by Rpl8,  
20 coimmunoprecipitated with Nmd3 and Arx1 regardless of Rpl1 expression (Fig. 2C).  
21 However, the ratio of Rpl1 to Rpl8 in the immunoprecipitated samples was significantly  
22 reduced by when Rpl1 was repressed (Fig. 2D). These results show that Nmd3 can bind



1 subunits lacking Rpl1, despite the loss of a large interaction surface between these two  
2 proteins.

### 3 **Truncation of the L1 stalk leads to a 60S export defect**

4 As a complementary means of assessing the importance of the L1 stalk for 60S export,  
5 we truncated the RNA of the L1 stalk. We replaced nucleotides 2451-2495 with the GNRA  
6 tetraloop GAGA (Ben Shem et al. 2011; Correll et al. 1999) , deleting the entire Rpl1  
7 binding site (Fig. 3A). We made the truncation in a construct that ectopically expressed  
8 25S rRNA with a unique oligo tag to be able to monitor the mutant ribosomal RNA in the  
9 presence of wild-type 60S. The oligo tag was inserted in ES8 and had no discernible  
10 effect on function (Fig. 3B). As anticipated, truncation of the L1 stalk was lethal, shown  
11 by its inability to complement deletion of the genomic rDNA locus (Fig. 3B). Nevertheless,  
12 we were able to monitor localization and incorporation of the mutant rRNA into subunits  
13 using fluorescence in situ hybridization (FISH) and northern blotting, respectively. The  
14 RNA of the L1 stalk truncation mutant accumulated in the nucleus but could also be  
15 detected in the cytoplasm (Fig. 3C), indicating that subunits with a truncated L1 stalk, and  
16 hence lacking Rpl1, can be exported to the cytoplasm, albeit less efficiently than wild-  
17 type. Surprisingly, this RNA sedimented in 60S, 80S and in polysomes, indicating that  
18 despite lacking a functional L1 stalk, the mutant RNA was incorporated into actively  
19 translating ribosomes. This was consistent with a previous report that Rpl1-deficient  
20 ribosomes can engage in translation (McIntosh et al. 2011). However, comparison of the  
21 ratio 25S rRNA from the L1 stalk $\Delta$  mutant to endogenously expressed 25S rRNA revealed  
22 differences in sedimentation of the mutant RNA compared to WT. Notably, the mutant  
23 strongly accumulated in free 60S subunits (Fig 3D, right panel, lanes 6 and 7) and was

1 somewhat enriched over wild-type in 80S and light polysomes (fractions 10-15) but was  
2 relatively depleted from deep polysomes (fractions 16-19). A shift towards lighter  
3 polysomes suggests that ribosomes without a functional L1 stalk arrest at or shortly after  
4 translation initiation. Together, these results indicate that ribosomes with a truncated L1  
5 stalk are exported slowly and engage with 40S subunits but accumulate in light  
6 polysomes, possibly because they are defective for elongation.

### 7 **Pre-60S subunits without Rpl1 fail to recruit Mex67-Mtr2 heterodimer efficiently**

8 The accumulation of Rpl25 and various shuttling biogenesis factors in the nucleus  
9 suggested that nascent 60S subunits lacking Rpl1 were defective in nuclear export.  
10 Possibly, nascent subunits lacking Rpl1 were unable to recruit factors involved in 60S  
11 export because of structural differences caused by loss of Rpl1. To identify such factors,  
12 we affinity purified nascent subunits and performed mass spectrometric proteomic  
13 analysis on them. After observing that Nmd3 can bind to large subunit particles lacking  
14 Rpl1 (Fig 2A-C), we decided to use C-terminal TAP-tagged Nmd3 as a bait for affinity  
15 purifying Pre-60S particles in *RPL1* repressed cells. As shown above, loss of Rpl1 from  
16 the pre-60S particle affected their nuclear export and accumulated particles in the  
17 nucleoplasm. For comparison, we affinity purified Nmd3-TAP particles from cells treated  
18 with LMB in an LMB-sensitive *CRM1-T539C* background (Grosshans et al. 2001), to  
19 mimic the nuclear accumulation of Rpl1-containing particles.

20 Spectral counts obtained from mass spectrometric analysis of the eluted samples were  
21 used to generate relative spectral abundance factor (RSAF) values as described  
22 previously (Sardana et al. 2015). We then generated ratios for RSAF values for each

1 protein in the sample to that of Tif6 protein in the same sample and normalized values to  
2 the L1-expressed + LMB samples. Figure 4A summarizes results from two independent  
3 experiments, comparing the relative RSAF values for the 60S export factors Arx1, Bud20  
4 and Mex67. While depletion of Rpl1 had no effect on the association of Arx1 or Bud20  
5 with Nmd3-bound pre-60S particles, Mex67 was not detectable on these particles (Fig  
6 4A). The loss of Mex67 from these particles was not due to reduced expression of Mex67  
7 in the Rpl1-repressed cells (Fig 4C).

8 To corroborate the results from mass spec, we also analyzed both the Rpl1-repressed,  
9 and the Rpl1-containing and LMB-treated samples by SDS-PAGE and western blotting  
10 for Rpl8, Rpl1 and Mex67. For additional controls, we carried out mock TAP purification  
11 from untagged cells as well as Nmd3-TAP purification from wild-type and Rpl10-  
12 repressed cells, to trap particles after export and at a very late step in cytoplasmic  
13 maturation at which Mex67 would be expected to have already been released. Finally, as  
14 an additional control experiment, particles were purified using Arx1-TAP from WT or  
15 *RPL1*-repressed cells. Similar to the mass spec analysis, the amount of Mex67 co-  
16 precipitating with Nmd3-bound particles sharply decreased in *RPL1*-repressed cells  
17 compared to LMB-treated cells (Figure 4B, lanes 2 and 3), suggesting that pre-60S  
18 particles devoid of Rpl1 inefficiently recruited Mex67. In samples from WT cells, without  
19 any LMB treatment (lane 4), relative Mex67 levels were comparable to those in the LMB-  
20 treated sample. The *RPL10*-repressed sample also exhibited a sharp decrease in Mex67  
21 levels (Figure 4B lane 5), as expected for a late-cytoplasmic particle. In Arx1-TAP  
22 samples too, less Mex67 was co-precipitated from *RPL1*-repressed cells compared to  
23 WT cells (Fig 4B lanes 6 and 7). However, the decrease was subtle compared to Nmd3-

1 TAP particles perhaps because Arx1 binds pre-60S earlier than Nmd3, significantly and  
2 before Mex67 and hence a smaller population of Arx1 particles is bound to Mex67-  
3 containing particles.

4 **High copy expression of the Mex67-Mtr2 heterodimer specifically suppresses the**  
5 **export defect of Rpl1 repression.**

6 The low levels of nuclear export factor Mex67 associated with nascent 60S subunits  
7 purified from Rpl1-repressed cells suggested that Rpl1 may have a role in recruiting the  
8 Mex67-Mtr2 heterodimer to nuclear pre-60S. To test if the export block could be  
9 overcome, we co-overexpressed Mex67 and Mtr2 in *rpl1b* $\Delta$  cells with *RPL1A* under  
10 galactose inducible/glucose repressible promotor also expressing Rpl25-GFP. As shown  
11 in Figure 1, Rpl25-GFP accumulated in the nucleus upon repression of *RPL1A* but  
12 remained cytoplasmic under the same conditions in the WT cells (Figure 5A). However,  
13 co-overexpression of Mex67 and Mtr2 alleviated the nuclear export defect of nascent  
14 subunits, monitored by Rpl25-GFP localization. To test if the effect of Mex67-Mtr2  
15 overexpression was specific to these export factors, we asked if over-expressing other  
16 60S nuclear export factors, Arx1 and Bud20, could mitigate the nuclear export defect  
17 caused by Rpl1 loss. Overexpression of neither of these two proteins affected the nuclear  
18 localization of Rpl25, suggesting that the Mex67-Mtr2 binding is specifically affected upon  
19 Rpl1 loss. Although overexpression of Mex67 and Mtr2 suppressed the nuclear export  
20 defect of Rpl1 repression, co-overexpression of Mex67 and Mtr2 did not suppress the  
21 lethality caused by repression of Rpl1 (Figure 5B), as expected because Rpl1 is an  
22 essential ribosomal protein that interacts with E site ligands during the translation cycle.

## 1 **Discussion**

2 Here, we have shown that the L1 stalk is needed for efficient export of pre-60S subunits  
3 from the nucleus. Although it was previously demonstrated that ribosomes lacking Rpl1  
4 can engage in translation and therefore must be exported (McIntosh et al. 2011; Shi et  
5 al. 2017; Segev and Gerst 2018), those studies did not explore a role for Rpl1 in nuclear  
6 export. Considering that Rpl1 is essential in yeast and provides part of the binding site for  
7 the nuclear export adapter Nmd3, it is somewhat surprising that loss of Rpl1 does not  
8 have a greater impact on 60S export. Nmd3 is conserved from archaea to higher  
9 eukaryotes, indicating that it has a more fundamental role in ribosome maturation that  
10 predates evolution of the nuclear envelope. Whereas the euryarchaeal proteins are  
11 similar to eukaryotic Nmd3 and contain an eIF5A-like domain which interacts with Rpl1,  
12 the lower archaeal Nmd3 proteins lack this domain. Thus, the conserved function of  
13 Nmd3, which is likely to promote the loading of Rpl10 (uL16) (Zhou et al. 2019), is  
14 independent of Rpl1 binding. The interaction with Rpl1 appears to be a more recent  
15 evolutionary development and may not be essential for Nmd3 function.

## 16 **Quality control and the L1 stalk**

17 Despite the essential nature of the L1 stalk and the expectation that quality control  
18 mechanisms monitor the nascent subunit for correct assembly, our work demonstrates  
19 that there is not a strict quality control pathway that assesses assembly of the L1 stalk. A  
20 similar observation was recently made for the RNA of internal transcribed spacer 2 (ITS2),  
21 which connects 5.8S and 25S RNA. The 232 nucleotides of ITS2 are normally removed  
22 by RNA processing in the nucleolus, prior to export. However, in mutants that are blocked

1 for ITS2 processing, pre-60S subunits retaining ITS2 RNA are exported to the cytoplasm  
2 (Sarkar et al. 2017). These ITS2-containing subunits also engage with 40S subunits in  
3 translating ribosomes. However, they appear to induce a translational stress and are  
4 recognized by cytoplasmic quality control pathways involving 3'-RNA decay machinery  
5 and the RQC complex. In both cases, whether the defective ribosomes themselves are  
6 targeted for degradation and/or induce degradation of associated mRNAs remains to be  
7 resolved.

### 8 **What is the role of the L1 stalk in large subunit export?**

9 The L1 stalk could impact export by one of a couple different but not mutually exclusive  
10 mechanisms. Because the L1 stalk is a highly flexible hydrophilic appendage, it might be  
11 unfavorable for passage through the NPC. Closing the L1 stalk by binding to Nmd3 would  
12 present a more compact structure to facilitate export. Similarly, expansion segment 27  
13 (ES27) forms a long dynamic helix in the vicinity of the exit tunnel and is captured by the  
14 export factor Arx1, restraining its movement (Greber et al. 2016). Conceivably, tethering  
15 both the L1 stalk and ES27 could be mechanisms to facilitate export. In an attempt to ask  
16 if reducing the length of the L1 stalk could enhance export by eliminating a “floppy” RNA  
17 element, we made further truncations of the L1 stalk. However, we did not observe  
18 enhanced export of these larger L1 stalk truncations (data not shown).

19       Alternatively, the L1 stalk may be important for efficient recruitment of an export  
20 factor. The translocation of large cargo molecules through the nuclear pore complex  
21 requires multiple receptors (Ribbeck and Görlich 2002). Indeed, nuclear export of pre-  
22 60S subunits in yeast requires the export adapter Nmd3 (which recruits the receptor

1 Crm1), the mRNA export receptor Mex67-Mtr2 and as well as Arx1 and Bud20 (Altvater  
2 et al. 2012; Bassler et al. 2012). Whereas the binding sites for Nmd3, Arx1 and Bud20  
3 are well-established, the binding site for Mex67-Mtr2 has been enigmatic. Although the  
4 Mex67-Mtr2 duplex can bind 5S rRNA (Yao et al. 2007), *in vitro* UV-induced  
5 crosslinking of Mex67 reconstituted with pre-60S particles affinity purified with Yvh1,  
6 identified binding sites in the P stalk and 5.8S but not 5S rRNA (Sarkar et al. 2016).  
7 However, our recent structural analysis of pre-60S maturation (Zhou et al. 2019) shows  
8 that Yvh1 is recruited to the pre-60S only after Nog1 is released in the cytoplasm, a  
9 conclusion reached by others as well (Nerurkar et al. 2018). Thus, Yvh1 loads onto the  
10 pre-60S particle after export from the nucleus, and after the requirement for Mex67 in  
11 export. We suggest that in the Yvh1-bound particle, P stalk RNA is exposed due to the  
12 absence of either Mrt4 or the stalk protein P0, possibly offering a site for promiscuous  
13 binding by Mex67-Mtr2. UV-induced crosslinking of Mex67 to RNAs *in vivo* identified a  
14 wide distribution of crosslinking sites in 25S and 5.8S rRNA (Tuck and Tollervey 2013)  
15 with a strong hits in 5.8S, overlapping what was found *in vitro* (Sarkar et al. 2016). In  
16 neither of these crosslinking studies was Mex67 crosslinking to the L1 stalk observed. In  
17 addition, we did not detect interaction between Mex67 and the L1 stalk by yeast three  
18 hybrid (data not shown). Nevertheless, it is possible that Mex67 recruitment to the  
19 particle is enhanced by closure of the L1 stalk, by making a binding site in the vicinity of  
20 the L1 stalk, possibly 5.8S, more accessible.

21       After export to the cytoplasm, the pre-60S undergoes a series of maturation events  
22 culminating in the completion of the peptidyl transferase center and release of Nmd3 and  
23 Tif6. We previously observed Nmd3 bound to the L1 stalk in partially closed states

1 (Malyutin et al. 2017) and suggested that the L1 stalk may be required for the release of  
2 Nmd3. However, the accumulation of Nmd3 in the nucleus in the absence of L1  
3 expression argues against a requirement for L1 in the removal of Nmd3. Similarly,  
4 mutations in Nmd3 that are predicted to disrupt its interaction with L1 have only a very  
5 modest impact on growth, contrary to what would be expected if the L1-Nmd3 interaction  
6 were necessary for the release of Nmd3 (data not shown).

7

### 8 **L1 stalk mutants in translation**

9 Rpl1 facilitates translation elongation assisting the release of E-site tRNAs and binding  
10 factors including eIF5A (Melnikov et al. 2016; Voorhees et al. 2009). Although the  
11 mechanism of translation is highly conserved, L1 is not essential in *E.coli* (Subramaniam  
12 and Dabbs 1980). It is essential in yeast but recent studies in both yeast and mammalian  
13 cells have detected L1 deficient ribosomes in actively translating pools (McIntosh et al.  
14 2011; Shi et al. 2017) . It has been suggested that yeast Rpl1-deficient ribosomes  
15 associated with polysomes are strongly discriminated against during translation initiation  
16 and a fraction of them is targeted for degradation (McIntosh et al. 2011). It has also been  
17 suggested that Rpl1 is required in “specialized ribosomes” for translating a specific subset  
18 of transcripts (Segev and Gerst 2018; Shi et al. 2017). Consistent with that, we show that  
19 ribosomes with truncated L1 stalk rRNA were able to engage in translation. However, the  
20 mutant ribosomes showed a strong bias towards lighter polysomes compared to wild-type  
21 ribosomes, possibly reflecting a general defect in elongation. Alternatively, ribosomes



1 without an L1 stalk may support elongation at very low rates and induce more frequent  
2 stalling.

### 3 **Materials and Methods**

#### 4 Strains plasmids and growth media

5 *S. cerevisiae* and plasmids used in this study are listed in Tables I and II. All cells were  
6 grown at 30°C in rich media (yeast extract and peptone) or synthetic dropout medium  
7 supplemented with 2% glucose or 1% galactose. Strains AJY3848, AJY3849, and  
8 AJY3850 were generated by genomic integration of *TIF6-GFP-HIS3MX*, *ARX1-GFP-*  
9 *HIS3MX* and *MRT4-GFP-HIS3MX*, amplified from AJY2909, AJY1948 and AJY3040,  
10 respectively, into KBM20. AJY4060 was generated by sporulation of KBM20 after  
11 mating with AJY1705. Strains AJY4001, AJY4008 and AJY4009 were generated by  
12 genomic integration of *NMD3-TAP-HIS3MX* amplified from AJY1874 into AJY3373,  
13 KBM13 and KBM20, respectively. AJY4012 and AJY4013 were generated by genomic  
14 integration of *ARX1-TAP-HIS3MX* amplified from AJY2491 into KBM13 and KBM20,  
15 respectively.

16

#### 17 Affinity purification of Nmd3-TAP and Arx1-TAP particles

18 Cultures of strains AJY1874, AJY4001, AJY4008, AJY4009, AJY4012 and AJY4013  
19 were grown to OD<sub>600</sub> of 0.3 in 500ml of YP media supplemented with 1% galactose.  
20 Glucose was added to a final 2% (w/v) concentration and cells were grown for one hour,  
21 harvested and cell pellets were frozen at -80°C. Cell pellets were washed and

1 resuspended in 1.5 volumes of lysis buffer (20mM HEPES, pH 7.5, 10mM  
2 MgCl<sub>2</sub>, 100mM KCl, 5mM β-mercaptoethanol, 1mM phenylmethylsulfonyl fluoride  
3 (PMSF), 1μM leupeptin, and 1μM pepstatin). Extracts were prepared by glass bead  
4 lysis and clarified by centrifugation at 4°C for 15 minutes at 18,000g. NP-40 was added  
5 to a final concentration of 0.15%(v/v) to the clarified extract which was then incubated  
6 with rabbit IgG (Sigma) coupled Dynabeads (Invitrogen) for 1h at 4°C. The Dynabeads  
7 were prepared as previously described(Oeffinger et al. 2007). Beads were then washed  
8 thrice with lysis buffer containing 0.15% NP-40 at 4°C for 5 minutes each time. The  
9 bound complexes were enzymatically eluted with tobacco etch virus protease in lysis  
10 buffer containing 0.15% NP-40 and 1mM Dithiothreitol for 90 minutes at 16°C.

#### 11 Polysome Analysis and western blots

12 Cultures of strains KBM13and KBM20were grown to OD<sub>600</sub> of 0.3 in 150ml of YP media  
13 supplemented with 1% galactose. Glucose was added to a final 2% (w/v) concentration  
14 and cells were grown for two more hours. Cycloheximide (CHX) was added to a final  
15 concentration of 100μg/ml, cultures incubated for 10 minutes at 30°C to arrest  
16 translation and preserve polysomes and cells were harvested and frozen at -80°C. Cell  
17 pellets were washed and resuspended in 1.5 volumes of polysome lysis buffer (20mM  
18 HEPES, pH 7.5, 10mM MgCl<sub>2</sub>, 100mM KCl, 100μg/ml CHX, 5mM β-mercaptoethanol,  
19 1mM PMSF, 1μM leupeptin, and 1μM pepstatin). Extracts were prepared by glass bead  
20 lysis and clarified by centrifugation at 4°C for 15 minutes at 18,000g. 9 A<sub>260</sub> units of  
21 clarified extract were loaded onto 7-47% sucrose gradients prepared in polysome lysis  
22 buffer and centrifuged for 2.5 hours at 40,000 rpm in a Beckman SW40 rotor. Gradients  
23 were fractionated using an ISCO Model 640 fractionator into 600μl fractions with

1 continuous monitoring at 254nm. 1.2 ml 100% ethanol was added to each fraction,  
2 vortexed and stored at -20°C overnight. Fractions were centrifuged at 4°C for 15  
3 minutes at 18,000g and pellets were dissolved in 1X Laemmli buffer and heated at 99°C  
4 for 3 mins. Proteins were separated on 6-15% gradient SDS-PAGE gels, transferred to  
5 nitrocellulose membrane and subjected to western blot analysis using anti-Nmd3, anti-  
6 Rpl8 (K.-Y. Lo) and anti-Rpl1 (J. Warner) antisera.

7

### 8 Sucrose gradient sedimentation and northern Blot Analyses

9 Saturated cultures of BY4741 transformed with pAJ1181 or pAJ3605 were diluted to  
10 OD<sub>600</sub> of 0.1 in SD Leu<sup>-</sup> and grown to mid log phase. Cell cultures were treated with  
11 CHX at 50µg/ml for 10 mins at 30°C to inhibit translation and then cells were harvested  
12 and stored at -80°C. Cells were washed once and then resuspended in 1.5-2 volumes  
13 lysis buffer (50 mM Tris-HCl pH 7.5, 100 mM KCl, 5 mM MgCl<sub>2</sub>, 50 µg/mL CHX, 1 mM  
14 PMSF, benzamidine, and 1 µM each of leupeptin and pepstatin). Extracts were  
15 prepared by glass bead lysis and clarified by centrifugation at 4°C for 15 minutes at  
16 18,000g. 9 A<sub>260</sub> units of clarified extract were applied to sucrose density gradients and  
17 fractionated as described above. 60µl of 20% SDS, 60µl of 3M Sodium acetate pH5.2  
18 and 1.3ml 100% ethanol were added to each sample and nucleic acids were  
19 precipitated overnight at -20°C. The precipitate was pelleted by centrifugation for  
20 30mins at 18000 rpm and 4°C. RNA pellets were washed with 70% ethanol and air  
21 dried. Pellets from each fraction were dissolved in 50µl RNase free water. Total RNA  
22 from one A<sub>260</sub> unit of clarified lysate was extracted similarly and dissolved in 50µl

1 RNase free water. 10ul RNA samples from lysate and from sucrose gradient fractions  
2 1-19 were vacuum dried and dissolved in 10 ul RNA sample loading buffer (Invitrogen  
3 AM8552). RNAs were resolved by electrophoresis through 1.2%-agarose MOPS 6%  
4 formaldehyde gel for 4 h at 50 volts. Northern blotting was performed as previously  
5 described (Li et al. 2009) using the oligos AJO190, AJO192 and AJO628 (Table III), and  
6 signal was detected by phosphoimaging on a GE Typhoon FLA9500.

7

## 8 Microscopy

9 For direct fluorescence experiments, cells were grown in selective medium (Leu<sup>-</sup> or His<sup>-</sup>)  
10 supplemented with 1% galactose for 48 hours, then diluted 4-fold in medium containing  
11 2% glucose and grown for 60-90 minutes to repress the expression of *RPL1A*. Images  
12 were captured using a Nikon E800 microscope fitted with a 100x Plan Apo objective and  
13 a Photometrics CoolSNAP ES camera controlled by NIS-Elements software. For  
14 fluorescence *in situ* hybridization experiments BY4741 cells transformed with pAJ1181  
15 or pAJ3605 were grown to saturation in Leu<sup>-</sup> medium with 2% glucose, then diluted 5-  
16 fold in fresh Leu<sup>-</sup> glucose medium and continued to grow for 60 minutes. Formaldehyde  
17 was added to a final concentration of 4.5% to the cell cultures and cells were fixed by  
18 agitating gently at room temperature for 30 minutes. Fixed cells were pelleted and  
19 washed twice with KSorb buffer (1.2M sorbitol, 0.1M potassium phosphate buffer 7.0).  
20 Cell pellets resuspended in 200ul KSorb, were treated with 50µg/ml Zymolyase T20 for  
21 15 minutes at 37°C in presence of 20mM Vanadyl Ribonucleoside complex (VRC),  
22 28mM β-mercaptoethanol and 1mM PMSF. Cells were gently pelleted and washed with

1 ice cold KSorb buffer thrice and resuspended in 100µl Ksorb buffer. 35µl cell  
2 suspension was applied to the wells of Teflon coated Immunofluorescence slides  
3 (Polysciences Inc, No. 18357) pre-coated with Poly-lysine. Slides were incubated in a  
4 moist chamber at room temperature for 10 mins, then excess cells were gently  
5 aspirated, and the slides were stored in 70% ethanol at -20°C. Cells were rehydrated by  
6 washing twice with 2X SSC (300mM NaCl, 30mM Sodium Citrate pH 7.0) and then  
7 incubated in 40µl Prehybridization solution (10% Dextran sulfate, 50% deionized  
8 formamide, 1X Denhardt's, 2mM VRC and 4X SSC, 0.2% BSA, 25µg yeast tRNA and  
9 500µg/ml ssDNA) for 1h at 72°C in a moist chamber. Excess solution was removed by  
10 aspiration and replaced with 40µl of Hybridization solution (Prehybridization solution  
11 containing 1µM Cy3 labelled oligo AJO1247) in each well. The slide was incubated in a  
12 moist chamber at 72°C for 1h followed by overnight incubation at 37°C. Next day, the  
13 wells were washed with 2X SSC and then 1X SSC containing 0.1% NP-40 for 30  
14 minutes each. Cells were incubated for 2 minutes with 1µg/ml DAPI, washed twice with  
15 PBS and mounted in Aqua-Poly/Mount (Polysciences, Inc). Images were captured as  
16 described above.

17

## 18 **Author Contributions**

19 S.M. and A.W.J. designed the study. S.M. designed and performed the experiments. J.B.  
20 performed the northern blot analysis. S.M. and A.W.J. interpreted the results and wrote  
21 the manuscript.

22

## 1 **Acknowledgements**

2 We thank Dr. J. R. Warner (Albert Einstein College of Medicine, New York) for his  
3 generous gift of yeast strains and anti-Rpl1 antibodies, Dr. K.-Y. Lo for anti-Rpl8 antibody  
4 and members of the Johnson lab for helpful discussions. This work was supported by NIH  
5 Grants GM53655 and GM127127 (to A.W.J.).

6

## 7 **Declaration of Interests**

8 The authors declare no competing interests.

## 9 **References**

- 10 Altvater M, Chang Y, Melnik A, Occhipinti L, Schütz S, Rothenbusch U, Picotti P, Panse  
11 VG. 2012. Targeted proteomics reveals compositional dynamics of 60S pre-  
12 ribosomes after nuclear export. *Molecular systems biology* **8**: 628.
- 13 Amsterdam A, Sadler KC, Lai K, Farrington S, Bronson RT, Lees JA, Hopkins N. 2004.  
14 Many Ribosomal Protein Genes Are Cancer Genes in Zebrafish ed. Derek  
15 Stemple. *PLoS Biology* **2**: e139.
- 16 Barrio-Garcia C, Thoms M, Flemming D, Kater L, Berninghausen O, Baßler J,  
17 Beckmann R, Hurt E. 2016. Architecture of the Rix1-Rea1 checkpoint machinery  
18 during pre-60S-ribosome remodeling. *Nature structural & molecular biology* **23**: 37–  
19 44.
- 20 Bassler J, Klein I, Schmidt C, Kallas M, Thomson E, Wagner MA, Bradatsch B,  
21 Rechberger G, Strohmaier H, Hurt E, et al. 2012. The Conserved Bud20 Zinc  
22 Finger Protein Is a New Component of the Ribosomal 60S Subunit Export  
23 Machinery. *Molecular and Cellular Biology* **32**: 4898–4912.
- 24 Ben Shem A, Garreau de L, Melnikov S, Jenner L, Yusupova G, Yusupov M. 2011. The  
25 structure of the eukaryotic ribosome at 3.0 Å resolution. *Science (New York, NY)*

- 1       **334**: 1524–1529.
- 2       Boulon S, Westman BJ, Hutten S, Boisvert F-M, Lamond AI. 2010. The nucleolus under  
3       stress. *Molecular cell* **40**: 216–27.
- 4       Bradatsch B, Katahira J, Kowalinski E, Bange G, Yao W, Sekimoto T, Baumgärtel V,  
5       Boese G, Bassler J, Wild K, et al. 2007. Arx1 Functions as an Unorthodox Nuclear  
6       Export Receptor for the 60S Preribosomal Subunit. *Molecular Cell* **27**: 767–779.
- 7       Cheng Z, Mugler CF, Keskin A, Hodapp S, Chan LY-L, Weis K, Mertins P, Regev A,  
8       Jovanovic M, Brar GA. 2019. Small and Large Ribosomal Subunit Deficiencies  
9       Lead to Distinct Gene Expression Signatures that Reflect Cellular Growth Rate.  
10      *Molecular Cell* **73**: 36–47.e10.
- 11      Correll CC, Wool IG, Munishkin A. 1999. The two faces of the Escherichia coli 23 S  
12      rRNA sarcin/ricin domain: the structure at 1.11 Å resolution. *Journal of Molecular*  
13      *Biology* **292**: 275–287.
- 14      De Keersmaecker K, Atak ZK, Li N, Vicente C, Patchett S, Girardi T, Gianfelici V,  
15      Geerdens E, Clappier E, Porcu M, et al. 2013. Exome sequencing identifies  
16      mutation in CNOT3 and ribosomal genes RPL5 and RPL10 in T-cell acute  
17      lymphoblastic leukemia. *Nature genetics* **45**: 186–90.
- 18      Gadal O, Strau D, Kessl J, Trumpower B, Tollervey D, Hurt E. 2001. Nuclear Export of  
19      60S Ribosomal Subunits Depends on Xpo1p and Requires a Nuclear Export  
20      Sequence-Containing Factor, Nmd3p, That Associates with the Large Subunit  
21      Protein Rpl10p. *Molecular and Cellular Biology* **21**: 3405–3415.
- 22      Greber BJ, Boehringer D, Montellese C, Ban N. 2012. Cryo-EM structures of Arx1 and  
23      maturation factors Rei1 and Jjj1 bound to the 60S ribosomal subunit. *Nature*  
24      *structural & molecular biology* **19**: 1228–33.
- 25      Greber BJ, Gerhardy S, Leitner A, Leibundgut M, Salem M, Boehringer D, Leulliot N,  
26      Aebersold R, Panse VG, Ban N, et al. 2016. Insertion of the Biogenesis Factor Rei1  
27      Probes the Ribosomal Tunnel during 60S Maturation. *Cell* **164**: 91–102.

- 1 Grosshans H, Deinert K, Hurt E, Simos G. 2001. Biogenesis of the signal recognition  
2 particle (SRP) involves import of SRP proteins into the nucleolus, assembly with  
3 the SRP-RNA, and Xpo1p-mediated export. *The Journal of cell biology* **153**: 745–  
4 62.
- 5 Hedges J, West M, Johnson AW, Aravind L, Koonin E, Ban N, Nissen P, Hansen J,  
6 Moore P, Steitz T, et al. 2005. Release of the export adapter, Nmd3p, from the 60S  
7 ribosomal subunit requires Rpl10p and the cytoplasmic GTPase Lsg1p. *The EMBO*  
8 *Journal* **24**: 567–579.
- 9 Ho JH-N, Kallstrom G, Johnson AW. 2000. Nmd3p Is a Crm1p-Dependent Adapter  
10 Protein for Nuclear Export of the Large Ribosomal Subunit. *The Journal of Cell*  
11 *Biology* **151**: 1057–1066.
- 12 Hung N-J, Lo K-Y, Patel SS, Helmke K, Johnson AW. 2007. Arx1 Is a Nuclear Export  
13 Receptor for the 60S Ribosomal Subunit in Yeast. *Molecular Biology of the Cell* **19**:  
14 735–744.
- 15 Kemmler S, Occhipinti L, Veisu M, Panse VG. 2009. Yvh1 is required for a late  
16 maturation step in the 60S biogenesis pathway. *The Journal of Cell Biology* **186**:  
17 863–880.
- 18 Kressler D, Hurt E, Baßler J. 2017. A Puzzle of Life: Crafting Ribosomal Subunits.  
19 *Trends in Biochemical Sciences* **42**: 640–654.
- 20 Li Z, Lee I, Moradi E, Hung NJ, Johnson AW, Marcotte EM. 2009. Rational extension of  
21 the ribosome biogenesis pathway using network-guided genetics. *PLoS Biology* **7**.
- 22 Lo K-Y, Johnson AW. 2009. Reengineering Ribosome Export ed. K. Weis. *Molecular*  
23 *Biology of the Cell* **20**: 1545–1554.
- 24 Lo K-Y, Li Z, Bussiere C, Bresson S, Marcotte EM, Johnson AW. 2010. Defining the  
25 pathway of cytoplasmic maturation of the 60S ribosomal subunit. *Mol Cell* **39**: 196–  
26 208.
- 27 Lo KY, Li Z, Wang F, Marcotte EM, Johnson AW. 2009. Ribosome stalk assembly



- 1 requires the dual-specificity phosphatase Yvh1 for the exchange of Mrt4 with P0.  
2 *Journal of Cell Biology* **186**: 849–862.
- 3 Ma C, Wu S, Li N, Chen Y, Yan K, Li Z, Zheng L, Lei J, Woolford JL, Gao N. 2017.  
4 Structural snapshot of cytoplasmic pre-60S ribosomal particles bound by Nmd3,  
5 Lsg1, Tif6 and Reh1. *Nature Structural & Molecular Biology* **24**: 214–220.
- 6 Malyutin AG, Musalgaonkar S, Patchett S, Frank J, Johnson AW. 2017. Nmd3 is a  
7 structural mimic of eIF5A, and activates the cpGTPase Lsg1 during 60S ribosome  
8 biogenesis. *The EMBO Journal* **36**: 854–868.
- 9 Matsuo Y, Granneman S, Thoms M, Manikas R-G, Tollervey D, Hurt E. 2014. Coupled  
10 GTPase and remodelling ATPase activities form a checkpoint for ribosome export.  
11 *Nature* **505**: 112–6.
- 12 McIntosh KB, Bhattacharya A, Willis IM, Warner JR. 2011. Eukaryotic Cells Producing  
13 Ribosomes Deficient in Rpl1 Are Hypersensitive to Defects in the Ubiquitin-  
14 Proteasome System ed. S.R. Ellis. *PLoS ONE* **6**: e23579.
- 15 Melnikov S, Mailliot J, Shin BS, Rigger L, Yusupova G, Micura R, Dever TE, Yusupov  
16 M. 2016. Crystal Structure of Hypusine-Containing Translation Factor eIF5A Bound  
17 to a Rotated Eukaryotic Ribosome. *JMolBiol* **428**: 3570–3576.
- 18 Mills EW, Green R. 2017. Ribosomopathies: There's strength in numbers. *Science* **358**:  
19 eaan2755.
- 20 Nerurkar P, Gillet L, Pena C, Schubert OT, Altvater M, Chang Y, Aebersold R, Panse V.  
21 2018. The GTPase Nog1 couples polypeptide exit tunnel quality control with  
22 ribosomal stalk assembly. *bioRxiv* 462333.
- 23 Oeffinger M, Wei KE, Rogers R, DeGrasse JA, Chait BT, Aitchison JD, Rout MP. 2007.  
24 Comprehensive analysis of diverse ribonucleoprotein complexes. *Nature Methods*  
25 **4**: 951–956.
- 26 Peña C, Hurt E, Panse VG. 2017. Eukaryotic ribosome assembly, transport and quality  
27 control. *Nature structural & molecular biology* **24**: 689–699.

- 1 Ribbeck K, Görlich D. 2002. The permeability barrier of nuclear pore complexes  
2 appears to operate via hydrophobic exclusion. *The EMBO Journal* **21**: 2664–2671.
- 3 Sarkar A, Pech M, Thoms M, Beckmann R, Hurt E. 2016. Ribosome-stalk biogenesis is  
4 coupled with recruitment of nuclear-export factor to the nascent 60S subunit.  
5 *Nature Structural & Molecular Biology* **23**: 1074–1082.
- 6 Sarkar A, Thoms M, Barrio-Garcia C, Thomson E, Flemming D, Beckmann R, Hurt E.  
7 2017. Preribosomes escaping from the nucleus are caught during translation by  
8 cytoplasmic quality control. *Nature structural & molecular biology* **24**: 1107–1115.
- 9 Segev N, Gerst JE. 2018. Specialized ribosomes and specific ribosomal protein  
10 paralogs control translation of mitochondrial proteins. *The Journal of cell biology*  
11 **217**: 117–126.
- 12 Shi Z, Fujii K, Kovary KM, Genuth NR, Röst HL, Teruel MN, Barna M. 2017.  
13 Heterogeneous Ribosomes Preferentially Translate Distinct Subpools of mRNAs  
14 Genome-wide. *Molecular Cell* **67**: 71–83.e7.
- 15 Smith MW, Meskauskas A, Wang P, Sergiev P V, Dinman JD. 2001. Saturation  
16 mutagenesis of 5S rRNA in *Saccharomyces cerevisiae*. *Molecular and cellular*  
17 *biology* **21**: 8264–75.
- 18 Subramaniam AR, Dabbs ER. 1980. Functional Studies on Ribosomes Lacking Protein  
19 L1 from Mutant *Escherichia coli*. *European Journal of Biochemistry* **112**: 425–430.
- 20 Thomas F, Kutay U. 2003. Journal of Cell Science. *J Cell Sci* **115**: 2985–2995.
- 21 Tuck AC, Tollervey D. 2013. A Transcriptome-wide Atlas of RNP Composition Reveals  
22 Diverse Classes of mRNAs and lncRNAs. *Cell* **154**: 996–1009.
- 23 Voorhees RM, Weixlbaumer A, Loakes D, Kelley AC, Ramakrishnan V. 2009. Insights  
24 into substrate stabilization from snapshots of the peptidyl transferase center of the  
25 intact 70S ribosome. *Nat Struct Mol Biol* **16**: 528–533.
- 26 Warren AJ. 2018. Molecular basis of the human ribosomopathy Shwachman-Diamond

- 1 syndrome. *Advances in Biological Regulation* **67**: 109–127.
- 2 White J, Li Z, Sardana R, Bujnicki JM, Marcotte EM, Johnson AW. 2008. Bud23  
3 Methylates G1575 of 18S rRNA and Is Required for Efficient Nuclear Export of Pre-  
4 40S Subunits. *Molecular and Cellular Biology* **28**: 3151–3161.
- 5 Woolford JL, Baserga SJ. 2013. Ribosome biogenesis in the yeast *Saccharomyces*  
6 *cerevisiae*. *Genetics* **195**: 643–81.
- 7 Wu S, Tutuncuoglu B, Yan K, Brown H, Zhang Y, Tan D, Gamalinda M, Yuan Y, Li Z,  
8 Jakovljevic J, et al. 2016. Diverse roles of assembly factors revealed by structures  
9 of late nuclear pre-60S ribosomes. *Nature* **534**: 133–7.
- 10 Yao W, Roser D, Köhler A, Bradatsch B, Baßler J, Hurt E. 2007. Nuclear Export of  
11 Ribosomal 60S Subunits by the General mRNA Export Receptor Mex67-Mtr2.  
12 *Molecular Cell* **26**: 51–62.
- 13 Zhou Y, Musalgaonkar S, Johnson AW, Taylor DW. 2019. Tightly-orchestrated  
14 rearrangements govern catalytic center assembly of the ribosome. *Nature*  
15 *Communications* **10**: 958.

16

17

18 **Table I. Strains used in this study**

| Strain  | Genotype                                                                                                       | Source               |
|---------|----------------------------------------------------------------------------------------------------------------|----------------------|
| AJY1185 | <i>MATa ade2-1 ura3-1 leu2-3 his3-11 can1-100 rdnAΔ::HIS3 with pAJ724 (35S URA3 2μ) and pAJ719 (5S TRP 2μ)</i> | (Smith et al. 2001)  |
| AJY1548 | <i>MATα CRM1(T539C) his3Δ1 leu2Δ0 met15Δ0 ura3Δ0 met15Δ0</i>                                                   | (Hedges et al. 2005) |
| AJY1705 | <i>MATα NMD3-GFP::KanMX CRM1(T539C) his3Δ1 leu2Δ0 met15Δ0 ura3Δ0 met15Δ0</i>                                   | (Hedges et al. 2005) |

|         |                                                                                                                                           |                              |
|---------|-------------------------------------------------------------------------------------------------------------------------------------------|------------------------------|
| AJY1874 | <i>MATa NMD3-TAP::HIS3MX his3Δ1 leu2Δ0 met15Δ0 ura3Δ0</i>                                                                                 | [OpenBiosystems]             |
| AJY1948 | <i>MATa ARX1-GFP::HIS3MX his3Δ1 leu2Δ0 met15Δ0 ura3Δ0 met15Δ0</i>                                                                         | [OpenBiosystems]             |
| AJY2491 | <i>MATa ARX1-TAP::HIS3MX his3Δ1 leu2Δ0 met15Δ0 ura3Δ0</i>                                                                                 | [OpenBiosystems]             |
| AJY2629 | <i>MATa arx1Δ::NatMX nmd3Δ::KanMX his3Δ1 leu2Δ0 ura3Δ0 with pAJ755( NMD3 URA3 CEN)</i>                                                    | This Study                   |
| AJY2909 | <i>MATa his3Δ1 leu2Δ0 ura3Δ0 met15Δ0 TIF6-GFP::HIS3MX</i>                                                                                 | [OpenBiosystems]             |
| AJY3040 | <i>MATa his3Δ1 leu2Δ0 ura3Δ0 met15Δ0 MRT4-GFP::HIS3MX</i>                                                                                 | [Open Biosystems]            |
| AJY3247 | <i>MATa KanMX-PGAL1-3XHA-NMD3 his3Δ1 leu2Δ0 ura3Δ0</i>                                                                                    | This Study                   |
| AJY3373 | <i>MATa KanMX::PGAL1-RPL10 his3Δ1 leu2Δ0 ura3Δ0</i>                                                                                       | De Keersmaecker et al., 2013 |
| AJY3848 | <i>MATa rpl1bΔ::NatMX KanMX-P<sub>GAL</sub>-RPL1A TIF6-GFP:HIS3MX can1Δ::P<sub>STE2</sub>-Sp-his5, Lyp1Δ his3Δ1 leu2Δ0 ura3Δ0 met15Δ0</i> | This study                   |
| AJY3849 | <i>MATa rpl1bΔ::NatMX KanMX-P<sub>GAL</sub>-RPL1A ARX1-GFP-HIS3MX can1Δ::P<sub>STE2</sub>-Sp-his5, Lyp1Δ his3Δ1 leu2Δ0 ura3Δ0 met15Δ0</i> | This study                   |
| AJY3850 | <i>MATa rpl1bΔ::NatMX KanMX-P<sub>GAL</sub>-RPL1A MRT4-GFP-HIS3MX can1Δ::P<sub>STE2</sub>-Sp-his5 Lyp1Δ his3Δ1 leu2Δ0 ura3Δ0 met15Δ0</i>  | This study                   |
| AJY4001 | <i>MATa NatMX-P<sub>GAL1</sub>-RPL10 NMD3-TAP-HIS3MX his3Δ1 leu2Δ0 ura3Δ0</i>                                                             | This study                   |
| AJY4008 | <i>MATa NMD3-TAP-HIS3MX CRM1(T539C) his3Δ1 leu2Δ0 ura3Δ0 met15Δ0</i>                                                                      | This study                   |
| AJY4009 | <i>MATa rpl1bΔ::NatMX KanMX-P<sub>GAL1</sub>-RPL1A NMD3-TAP-HIS3MX can1Δ::P<sub>STE2</sub>-Sp-his5 Lyp1Δ his3Δ1 leu2Δ0 ura3Δ0 met15Δ0</i> | This study                   |
| AJY4012 | <i>MATa ARX1-TAP-HIS3MX can1Δ::P<sub>STE2</sub>-Sp-his5 Lyp1Δ his3Δ1 leu2Δ0 ura3Δ met15Δ0</i>                                             | This study                   |

|             |                                                                                                                                                                                                                                                                                          |                       |
|-------------|------------------------------------------------------------------------------------------------------------------------------------------------------------------------------------------------------------------------------------------------------------------------------------------|-----------------------|
| AJY4013     | <i>MAT<math>\alpha</math> rpl1b<math>\Delta</math>::NatMX KanMX-P<sub>GAL1</sub>-RPL1A ARX1-TAP-HIS3MX can1<math>\Delta</math>::P<sub>STE2</sub>-Sp-his5 Lyp1<math>\Delta</math> his3<math>\Delta</math>1 leu2<math>\Delta</math>0 ura3<math>\Delta</math> met15<math>\Delta</math>0</i> | This study            |
| AJY4060     | <i>MAT<math>\alpha</math> rpl1b<math>\Delta</math>::NatMX KanMX-P<sub>GAL1</sub>-RPL1A NMD3-GFP-HIS3MX can1<math>\Delta</math>::P<sub>STE2</sub>-Sp-his5 Lyp1<math>\Delta</math> his3<math>\Delta</math>1 leu2<math>\Delta</math>0 ura3<math>\Delta</math> met15<math>\Delta</math>0</i> | This study            |
| KBM13       | <i>MAT<math>\alpha</math> can1<math>\Delta</math>::P<sub>STE2</sub>-Sp-his5 Lyp1<math>\Delta</math> his3<math>\Delta</math>1 leu2<math>\Delta</math>0 ura3<math>\Delta</math>0 met15<math>\Delta</math>0</i>                                                                             | McIntosh et al., 2011 |
| KBM20       | <i>MAT<math>\alpha</math> rpl1b<math>\Delta</math>::NatMX KanMX-P<sub>GAL</sub>-RPL1A can1<math>\Delta</math>::P<sub>STE2</sub>-Sp-his5 Lyp1<math>\Delta</math> his3<math>\Delta</math>1 leu2<math>\Delta</math>0 ura3<math>\Delta</math>0 met15<math>\Delta</math>0</i>                 | McIntosh et al., 2011 |
| BY4741 (WT) | <i>MAT<math>\alpha</math> his3<math>\Delta</math>1 leu2<math>\Delta</math>0 met15<math>\Delta</math>0 ura3<math>\Delta</math>0 met15<math>\Delta</math>0</i>                                                                                                                             |                       |

## 1 Table II. Plasmids used in this study

| Plasmid | Description                                      | Source                   |
|---------|--------------------------------------------------|--------------------------|
| pAJ718  | <i>rDNA LEU2 2<math>\mu</math></i>               | (White et al. 2008)      |
| pAJ719  | <i>5S rDNA LEU2 2<math>\mu</math></i>            | (Smith et al. 2001)      |
| pAJ724  | <i>rDNA URA3 2<math>\mu</math></i>               | (Smith et al. 2001)      |
| pAJ582  | <i>NMD3-GFP LEU2 CEN</i>                         | (Hedges et al., 2005)    |
| pAJ907  | <i>RPL25-GFP LEU2 CEN</i>                        | (Kallstrom et al., 2003) |
| pAJ1181 | <i>rDNA LEU2 CEN</i>                             | This study               |
| pAJ3605 | <i><math>\Delta</math>L1 stalk-rDNA LEU2 CEN</i> | This study               |
| pAJ3972 | <i>MEX67 MTR2 URA3 2<math>\mu</math></i>         | This study               |
| pAJ4315 | <i>ARX1 URA3 2<math>\mu</math></i>               | This study               |
| pAJ4316 | <i>BUD20 URA3 2<math>\mu</math></i>              | This study               |
| pRS415  | <i>LEU2 CEN</i>                                  |                          |
| pRS416  | <i>URA3 CEN</i>                                  |                          |
| pRS426  | <i>URA3 2<math>\mu</math></i>                    |                          |

2

## 3 Table III. Oligonucleotides used in this study

| Oligo | Sequence |
|-------|----------|
|-------|----------|

AJO190 5'- GTCTGGACCTGGTGAGTTTCCC-3'  
AJO192 5'- CCCGCCGTTTACCCGCGCTTGG-3'  
AJO628 5'- CTGCAGAAGAACCGGAGTGCAATGGCTCTTC-3'  
AJO1247 5'-Cy3TCGGGCCTGCAGAAGAACCGGAGTGCAATGGCTCTTCACCGA-3'

1

2

3

#### 4 **Figure Legends**

5 **Figure 1. Depletion of Rpl1 reduces 60S export.** A) The localization of Rpl25-GFP  
6 expressed from plasmid pAJ907 was visualized in cells of strain KBM20 expressing  
7 *RPL1A* (Galactose) or after 2 hours of repression of *RPL1A* (Glucose). GFP, tagged  
8 Rpl25; DIC, differential interference contrast. B) The localization of Mrt4-GFP (AJY3850),  
9 Tif6-GFP (AJY3848), Arx1-GFP (AJY3849) and Nmd3-GFP (AJY4060) was visualized in  
10 cells expressing *RPL1A* (Galactose) or after 2 hrs of repression of *RPL1A* (Glucose).

11 **Figure 2. Nmd3 binds to subunits lacking Rpl1.** A and B) Polysome profiles and  
12 western blots for monitoring sedimentation of Nmd3, Rpl1 and Rpl8 from extracts of WT  
13 (KBM13) and *GAL::RPL1* (KBM20) cells, respectively, grown in galactose media  
14 followed by 2h growth after adding glucose. C) Western blots for affinity purification of  
15 Nmd3-TAP (AJY4009, lanes 1 and 2) and Arx1-TAP (AJY4013, lanes 3 and 4) from  
16 *GAL::RPL1* cells either grown in galactose medium continually (lanes 1 and 3) or for 2h  
17 after addition of glucose (lanes 2 and 4). D) Ratios of Rpl1 to Rpl8 signal from western

1 blot in C were calculated and normalized to the Rpl1 to Rpl8 ratios for cells grown  
2 continuously in galactose medium.

3 **Figure 3. Truncation of L1 stalk RNA leads to a 60S export defect.** A) Cartoon of 25S  
4 rRNA for WT and L1-stalk truncation showing expected lack of Rpl1 binding when RNA  
5 was truncated. B) Plasmids constructs expressing WT (pAJ1181) or L1 stalk $\Delta$  (pAJ3605)  
6 rRNA were transformed into AJY1185 (rDNA $\Delta$ , 35S URA3 2 $\mu$ ) and complementation was  
7 tested on 5-FOA media. C) Fluorescence *in situ* hybridization and microscopy using oligo  
8 (AJO628) hybridizing to a unique tag in 25S rRNA expressed from plasmid constructs for  
9 WT (pAJ1181) and L1 stalk $\Delta$  (pAJ3605) in strain BY4741. D) Sucrose gradient  
10 sedimentation and northern blot analysis using oligo (AJO628) against a unique tag on  
11 rRNA expressed from WT (pAJ1181) or L1 stalk $\Delta$  (pAJ3605) rRNA. Total 25S and 18S  
12 rRNAs were detected using oligos AJO192 and AJO190, respectively.

13 **Figure 4. Nascent subunits lacking Rpl1 fail to recruit Mex67 efficiently.** A) Nmd3-  
14 TAP was purified from *RPL1*-repressed cells and from LMB-treated cells. Spectral counts  
15 for Arx1, Bud20 and Mex67 were normalized to Tif6 levels in each sample. TAP  
16 purifications were from AJY4008 treated with LMB for 30 minutes and from AJY4009 in  
17 which *RPL1* was repressed for 1.5 hours. B) Western blots for Mex67, Rpl1 and Rpl8 in  
18 TAP purification samples from BY4741, AJY4008 treated with LMB for 30 minutes,  
19 AJY4009, AJY1874, AJY4001, AJY4012 and AJY4013 grown in galactose followed by  
20 1.5h glucose treatment (lanes 1-7 respectively). Mex67:Rpl8 and Rpl1:Rpl8 were  
21 calculated for each sample. Mex67:Rpl8 ratio in each sample was normalized to that in  
22 the LMB sample (lane 2), and Rpl1:Rpl8 ratio in each sample was normalized to that in  
23 the WT NMD3-TAP samples (lane 4). C) Western blots for Mex67 and Rpl8 in extracts

1 from KBM13 and KBM20 grown in galactose containing media for 48h and then diluted  
2 and grown in fresh glucose containing medium for 1.5h.

3 **Figure 5. High copy expression of Mex67-Mtr2 heterodimer specifically suppresses**  
4 **the 60S export defect caused by Rpl1 loss.** Rpl25-GFP viewed in A) WT (KBM13)  
5 transformed with *RPL25*-GFP (pAJ907) and empty vector (pRS426) and in *rpl1b* $\Delta$  *P*<sub>GAL</sub>-  
6 *RPL1A* (KBM20) with *RPL25*-GFP and empty vector or B) high copy *MEX67+MTR2*  
7 (pAJ3972), *ARX1* (pAJ4315) or *BUD20* (pAJ4316) and grown in Leu-Ura- media with  
8 galactose for 48h and then diluted 5-folds in glucose containing media and grown for 1.5  
9 hours more. C) 10-fold serial dilutions of the KBM13 or KBM20 transformed with empty  
10 vector or *MEX67+MTR2* were spotted on glucose-containing selective media to repress  
11 *P*<sub>GAL</sub>:*RPL1A* in KBM20. D) Rpl25-GFP viewed in upper panel: *rpl1b* $\Delta$  (KBM17)  
12 transformed with *RPL25*-GFP (pAJ907) and empty vector (pRS426) and lower panel:  
13 KBM17 transformed with *RPL25*-GFP and *MEX67 MTR2* and grown in Leu-Ura- media  
14 with glucose for 48h and then diluted 5-fold in glucose-containing media and grown for  
15 1.5 hours more.

16



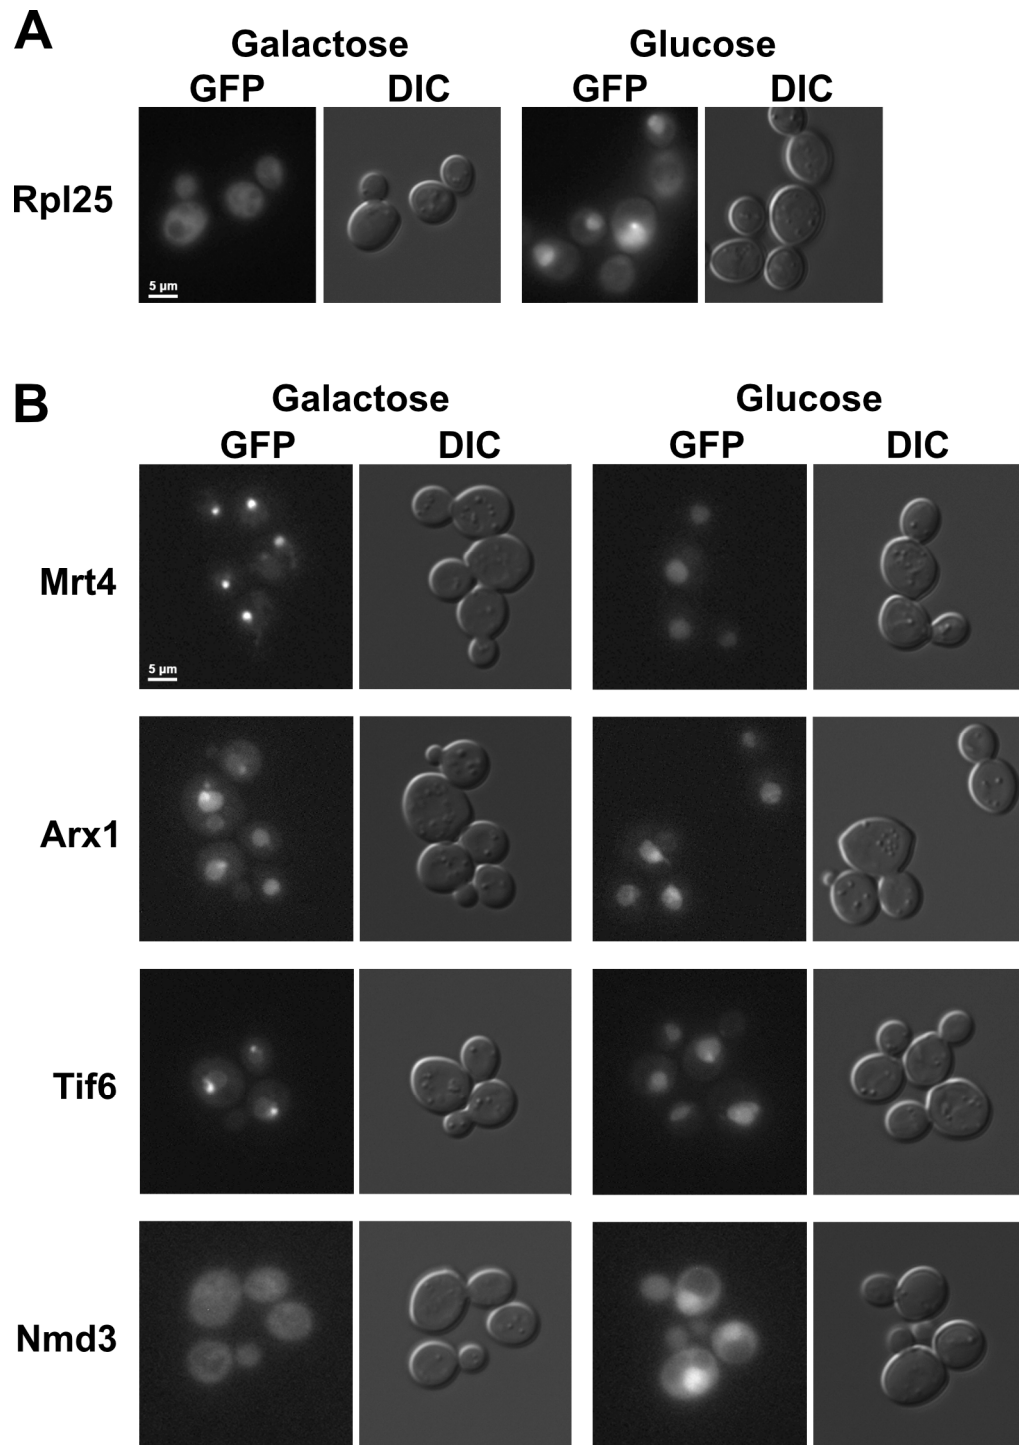

Figure 1, Musalgaonkar et al

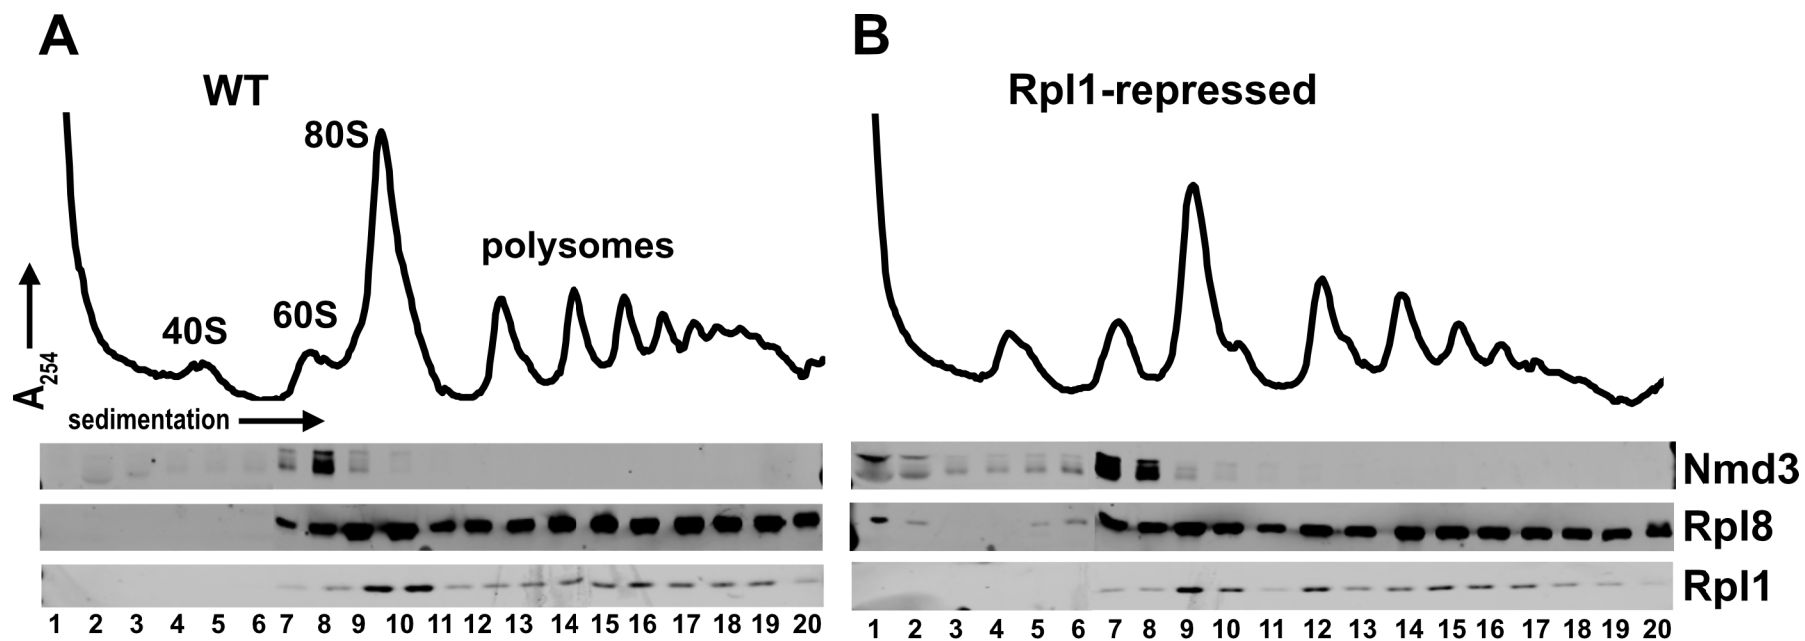

Figure 2, Musalgaonkar et al

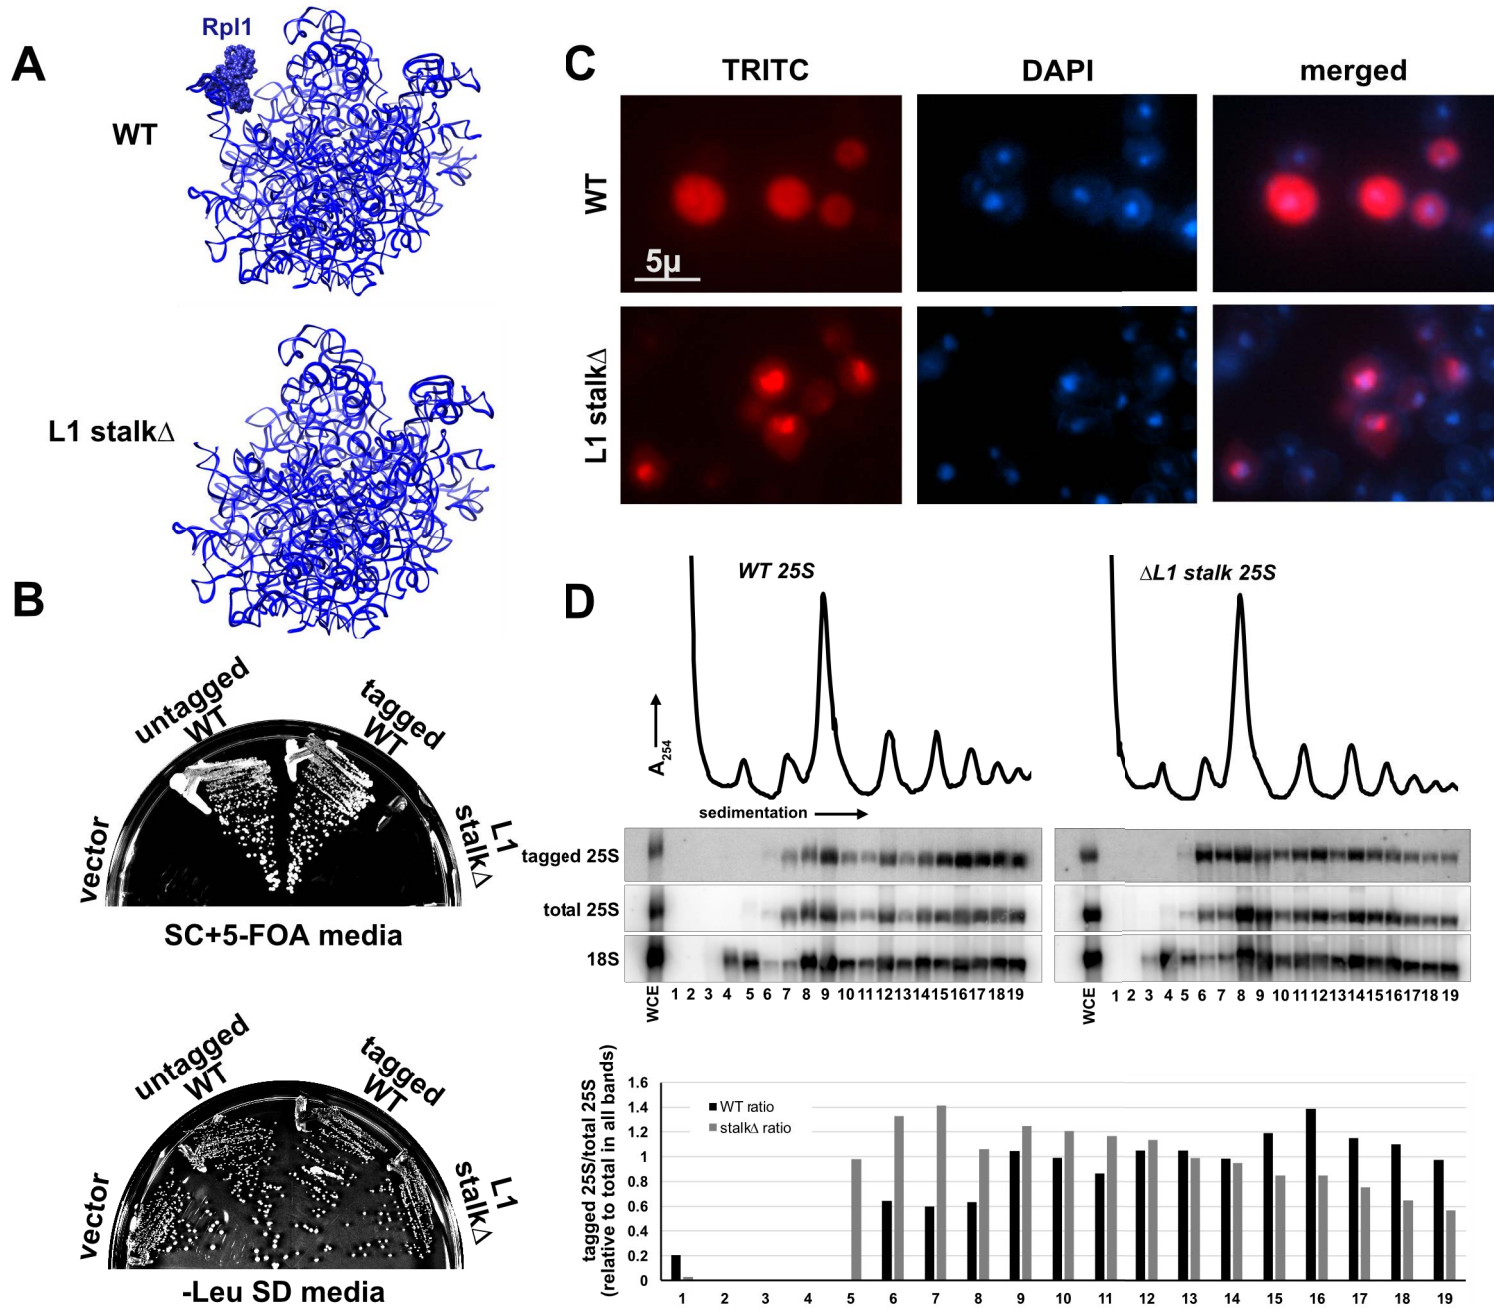

Figure 3, Musalgaonkar et al

**A**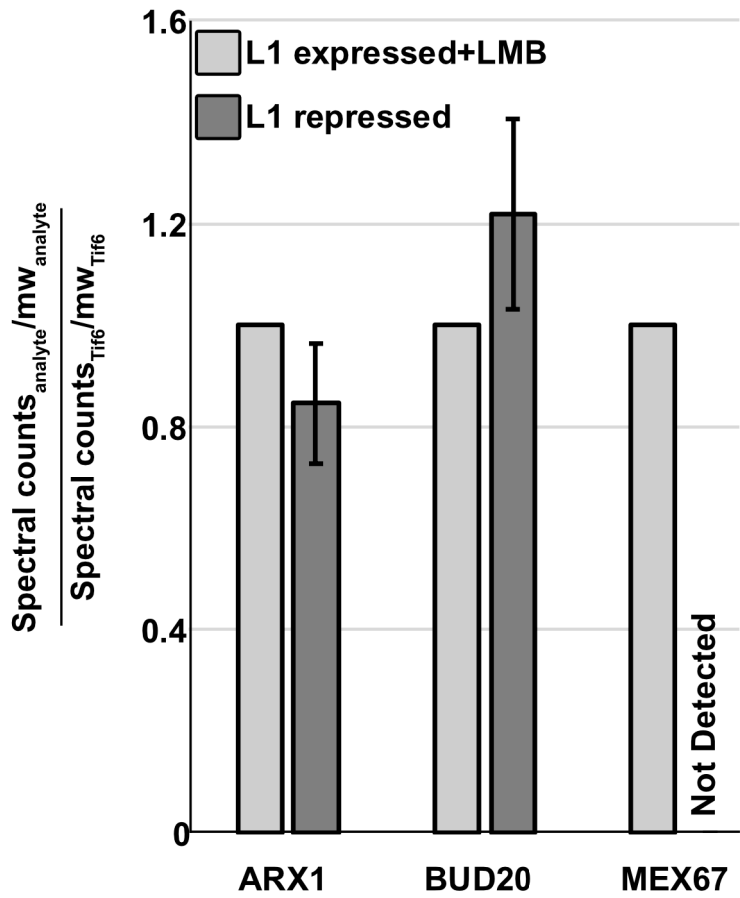**B**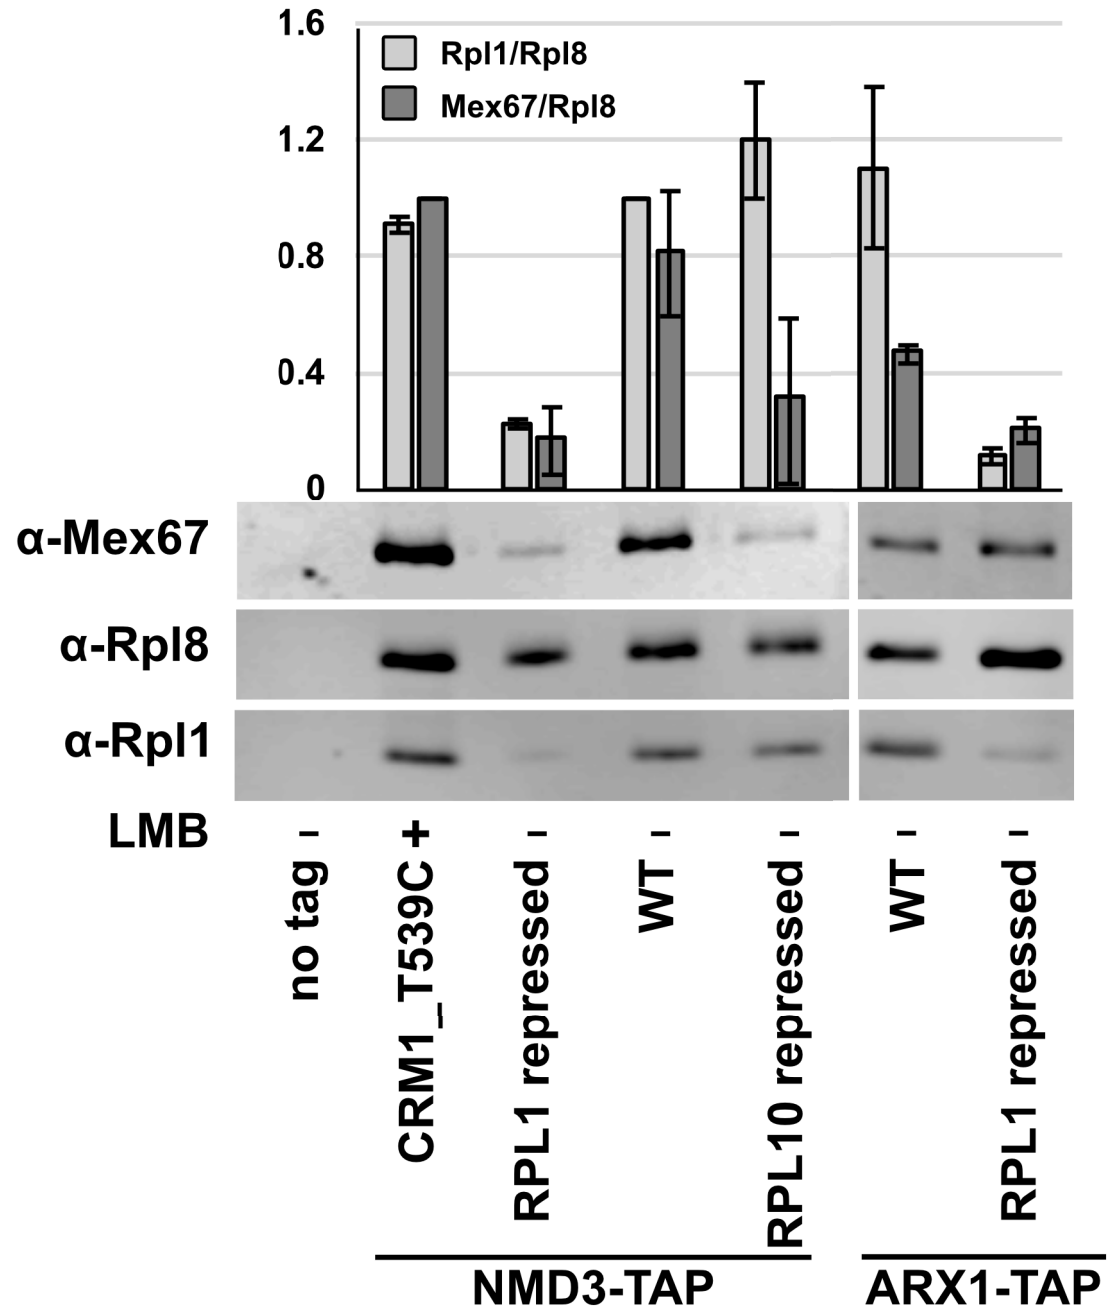**C**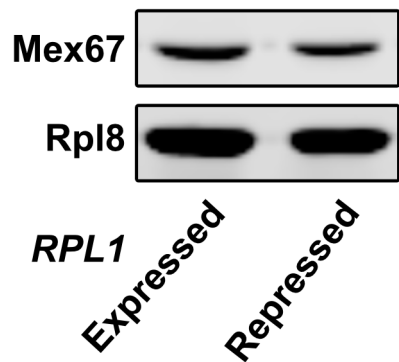

Figure 4, Musalgaonkar et al

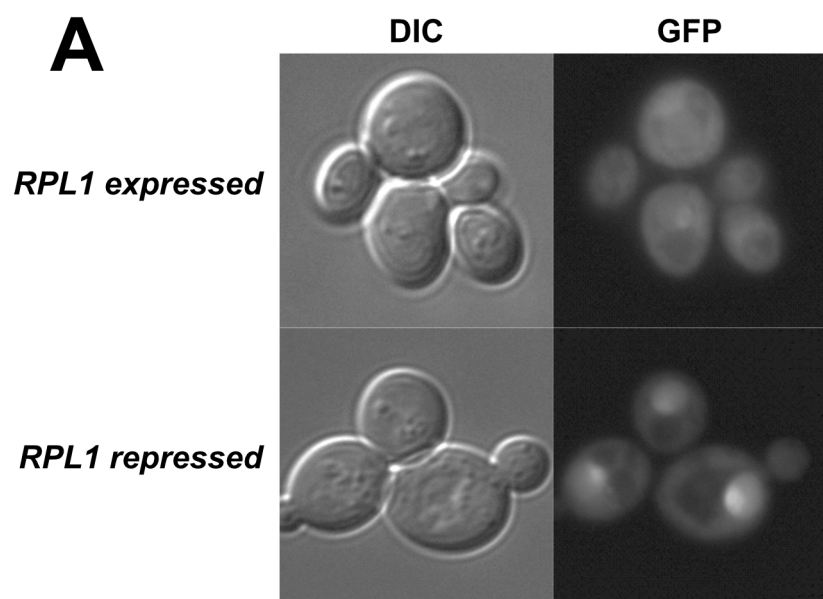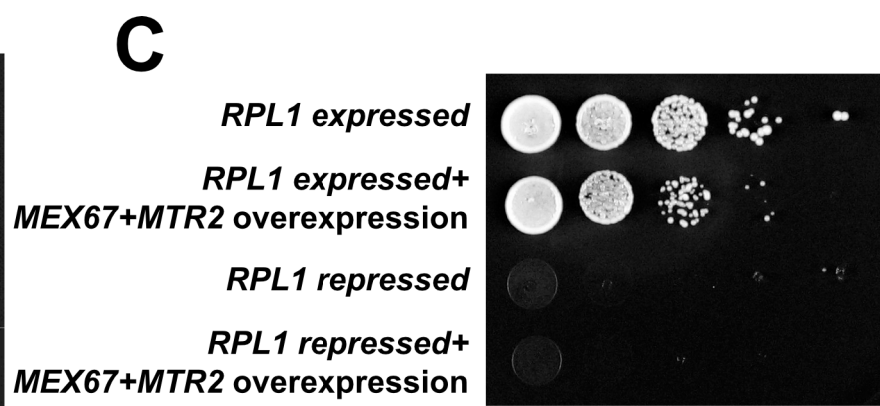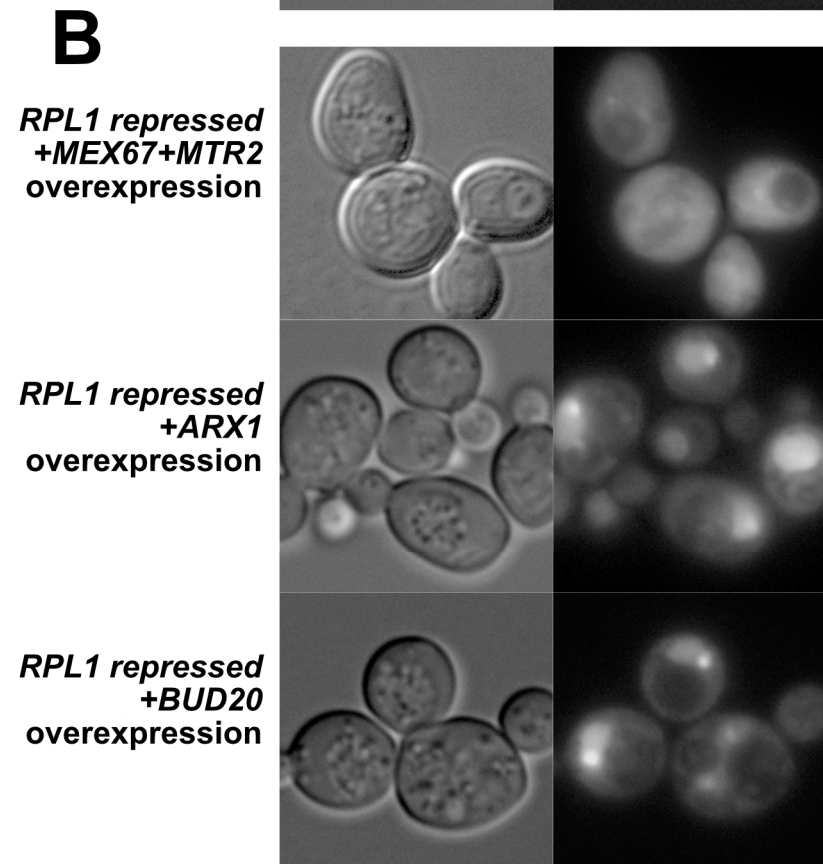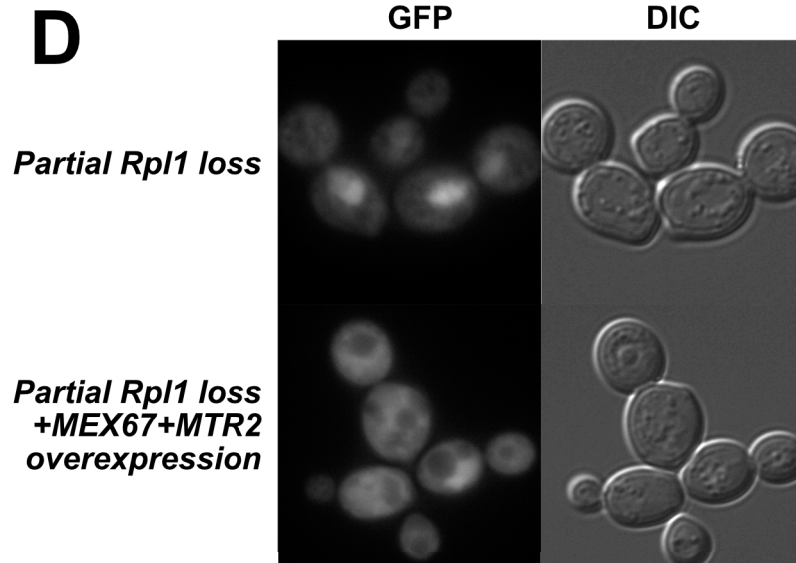

Figure 5, Musalgaonkar et al
